# Supplementary material for: Improved performance of asymmetric fiber-based micro-supercapacitors using carbon nanoparticles for flexible energy storage
Source: Royal Society of Chemistry journal article supplement (doi:10.1039/c5ta03576g), 2015-01-01
Supplement: c5ta03576g1.pdf [file c5ta03576g1.pdf]

## Supporting information

### Improved performance of asymmetric fiber-based micro-supercapacitors using carbon nanoparticles for flexible energy storage

*Huanyu Jin<sup>a</sup>, Limin Zhou<sup>b</sup>, Chee Leung Mak<sup>a</sup>, Haitao Huang<sup>a</sup>, Wing Man Tang<sup>a,\*</sup>, and Helen Lai Wa Chan<sup>a</sup>*

<sup>a</sup>Department of Applied Physics, The Hong Kong Polytechnic University, Hung Hom, Hong Kong

<sup>b</sup>Department of Mechanical Engineering, The Hong Kong Polytechnic University, Hung Hom, Hong Kong

\*Correspondence author: [wmtang@polyu.edu.hk](mailto:wmtang@polyu.edu.hk) (WMT)

**Calculations.** The volumetric capacitance ( $C_v$ ) of the electrodes was calculated through the following equation:

$$C_v = I\Delta t / (V\Delta E) \quad (1)$$

where  $I$  is the discharge current,  $\Delta t$  is the discharge time,  $\Delta E$  is the potential window during

the discharge process (after IR drop), and  $V$  is the effective volume of the carbon fiber electrode.

$C_v$  of the electrodes could be also calculated from the CV curves using the following equation (2):

$$C_v = A/(2Vs\Delta E) \quad (2)$$

where  $A$  is the area of the CV curve and  $s$  is the scan rate.

Volumetric energy density ( $E_v$ ) and power density ( $P_v$ ) of the SC device are calculated by following equations:

$$E_v = 0.5C_d(\Delta U)^2/V_d \quad (3)$$

$$P_v = E_v/\Delta t \quad (4)$$

where  $C_d$  is the capacitance of the SC device,  $V_d$  is the volume of the SC device,  $\Delta U$  is the operating voltage of the SC device and  $\Delta t$  is the discharging time.

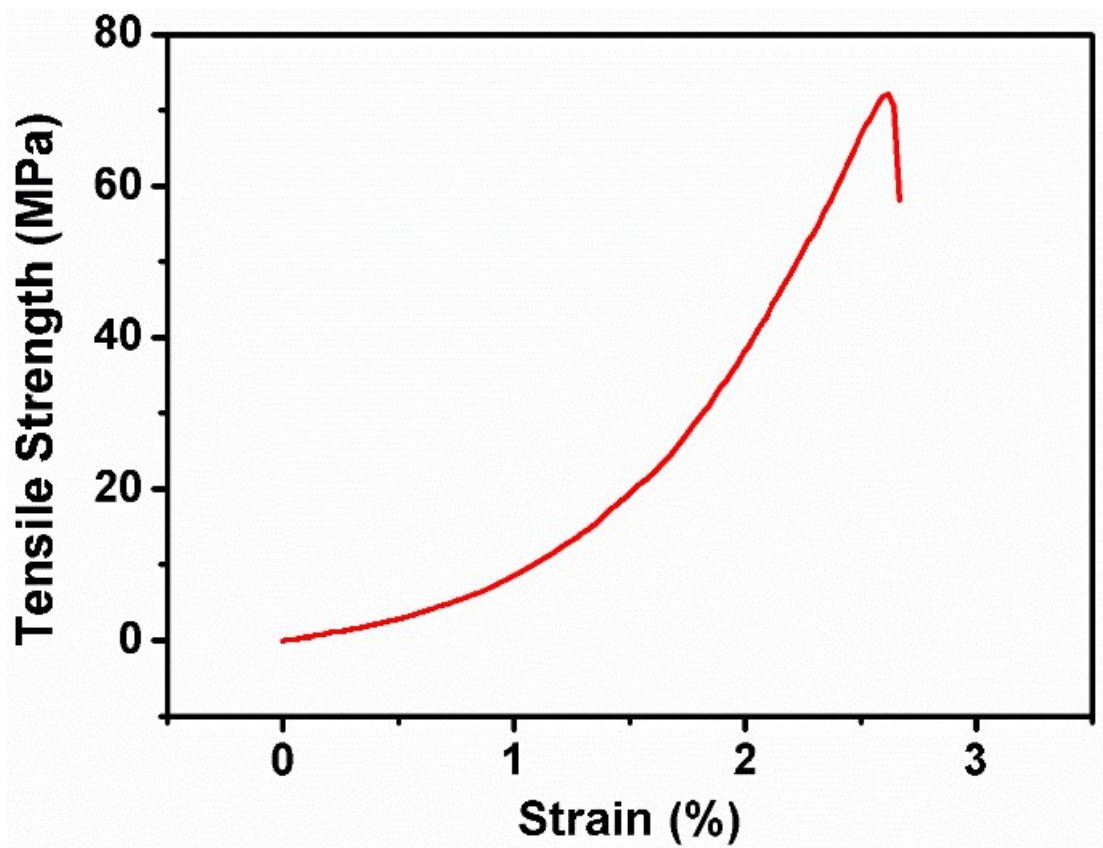

**Figure S1.** The tensile strength versus strain curve of the MCNP electrode as measured by a tensile and compression tester (INSTRON 5944).

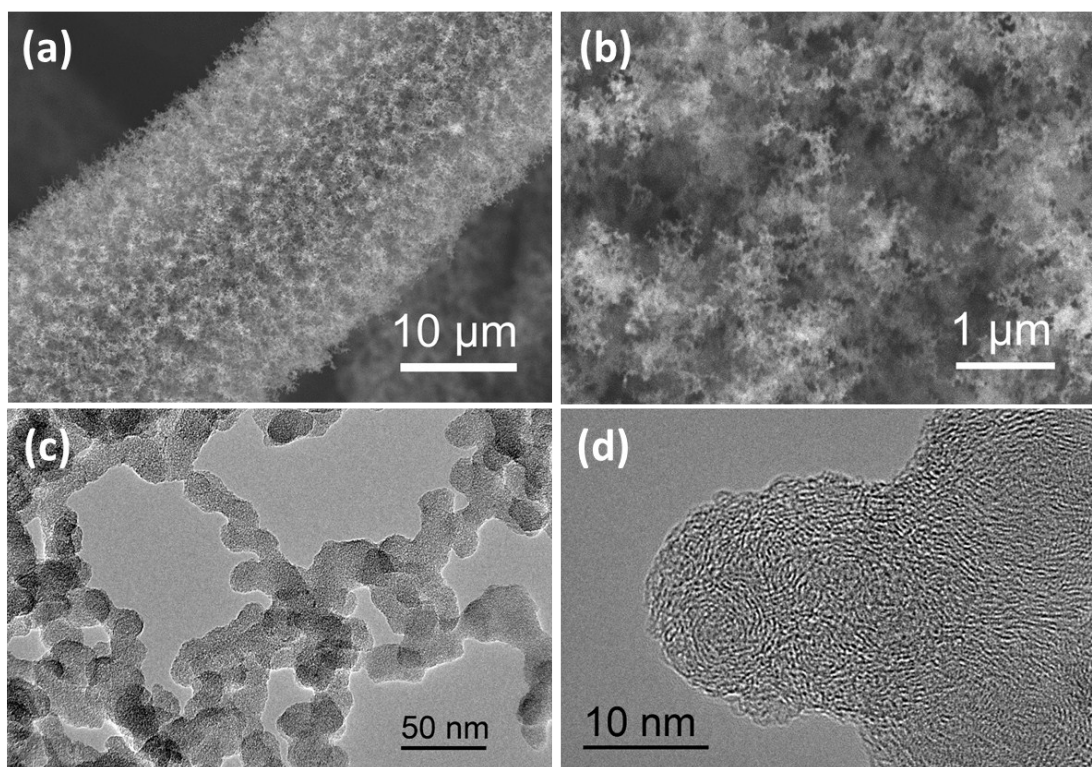

**Figure S2.** (a) SEM image of a CNPs coated carbon fiber electrode. (b) High resolution SEM image showing the morphology of the CF@CNPs electrode. (c) TEM image of CNP. (d) High resolution TEM image of CNP.

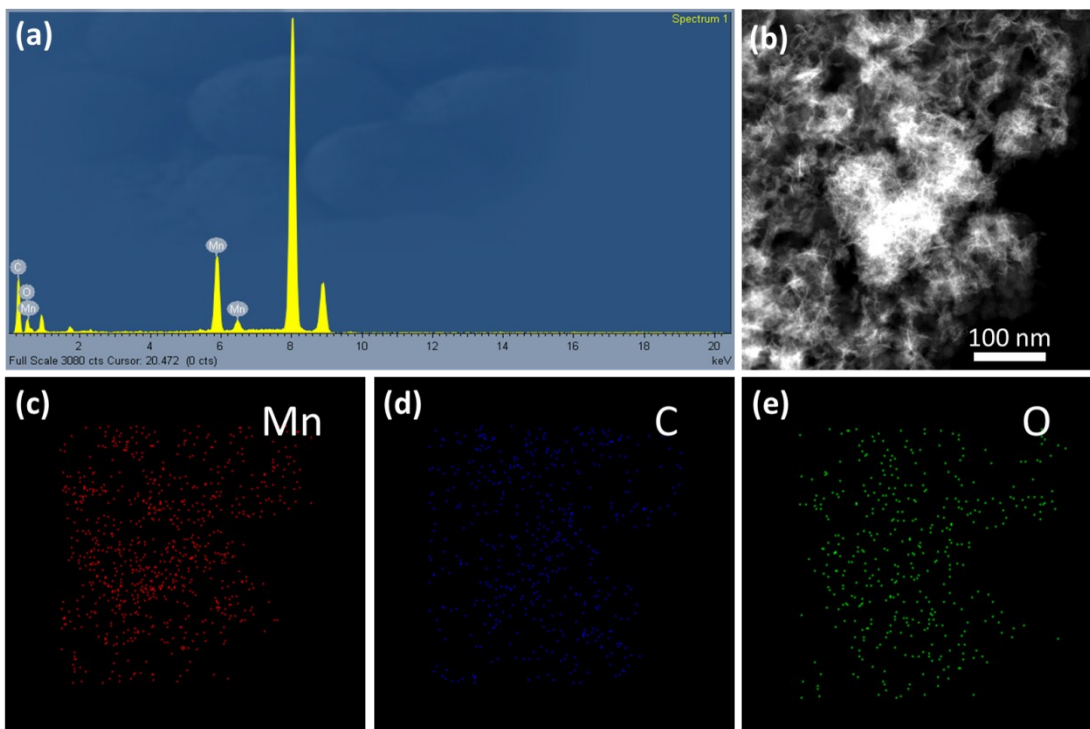

**Figure S3.** (a) EDS spectrum of  $\text{MnO}_2$  and CNP composite. (b) STEM images of  $\text{MnO}_2$  and CNP composite. (c), (d) and (e) Mn, C and O element mapping, corresponding to the area of (b).

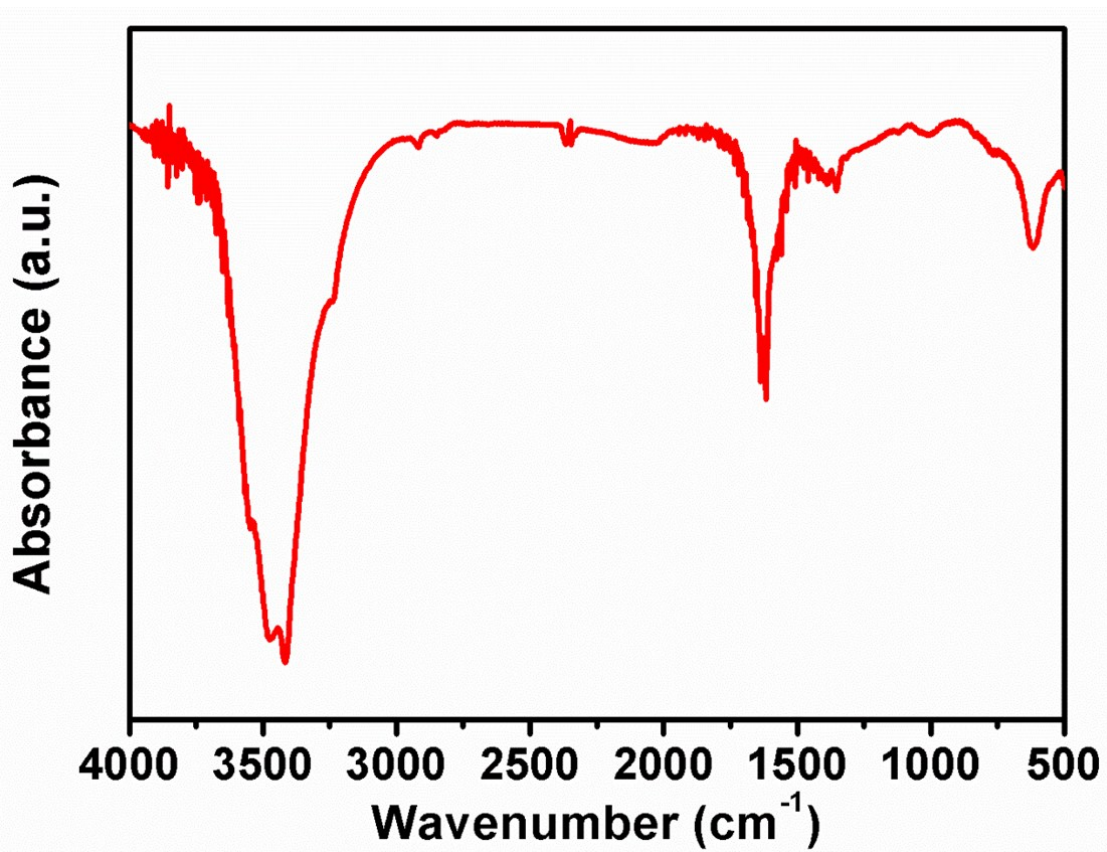

Figure S4. FTIR spectrum of the FCNP electrode.

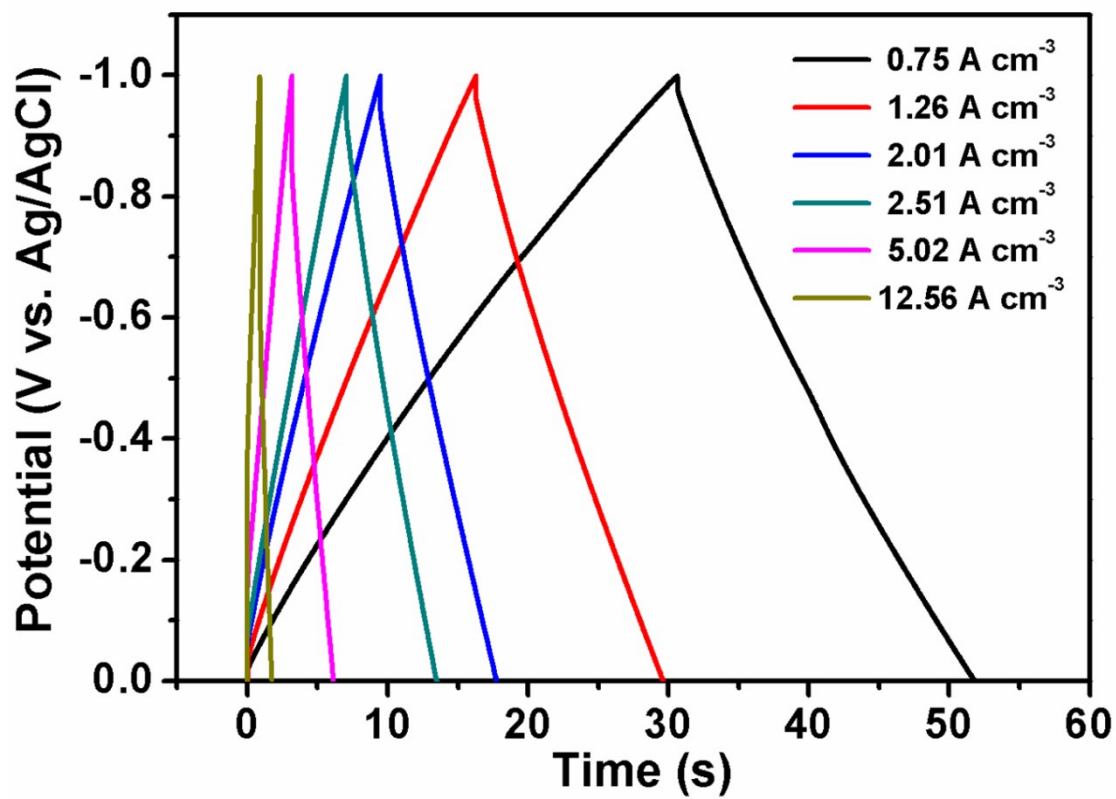

Figure S5. GCD curves of FCNP electrode at different current densities.

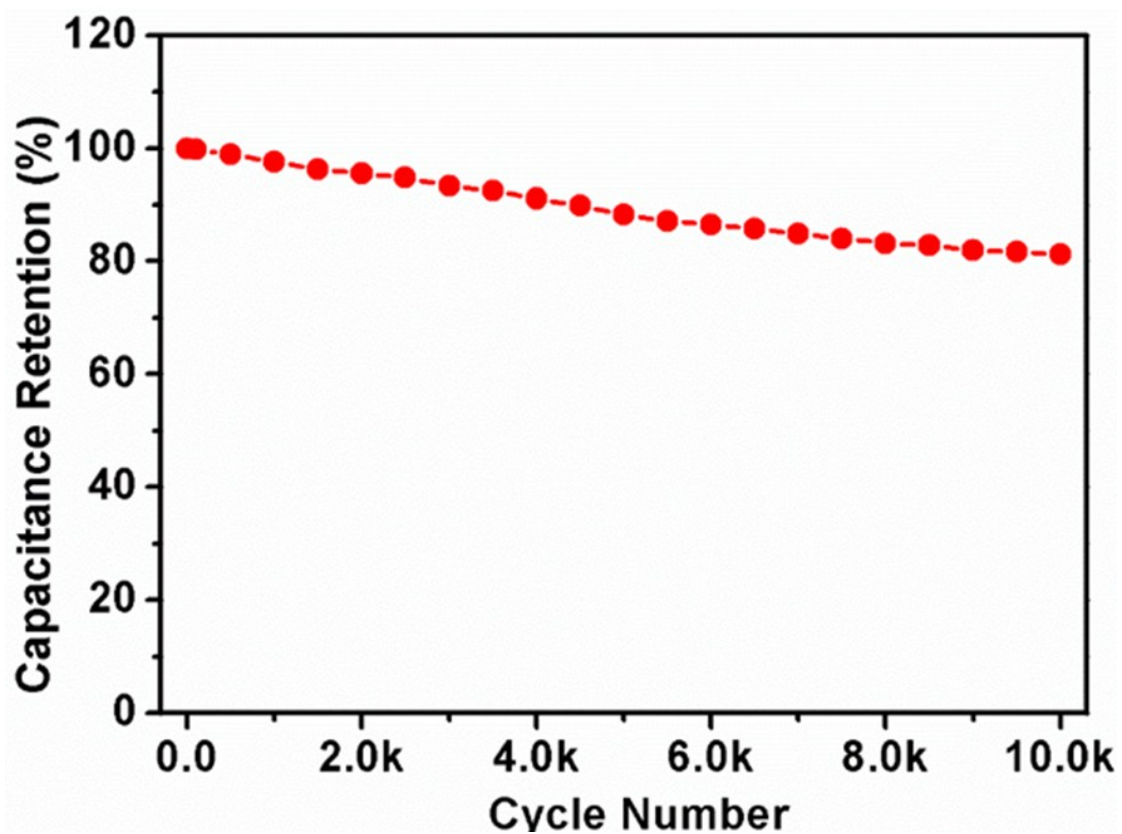

**Figure S6.** Cycle performance of the solid-state ASC device at a scan rate of  $500 \text{ mV s}^{-1}$  for 10 000 cycles.



| Ref      | Device Form | Energy density (mWh cm <sup>-3</sup> ) | Power density (W cm <sup>-3</sup> ) | Electrolyte                         |
|----------|-------------|----------------------------------------|-------------------------------------|-------------------------------------|
| 6        | Planar      | 1                                      | 1000                                | Et <sub>4</sub> NBF <sub>4</sub>    |
| 8        | Planar      | 0.6                                    | 200                                 | PVA/H <sub>2</sub> SO <sub>4</sub>  |
| 14       | Fiber       | 0.22                                   | 0.4                                 | PVA/H <sub>3</sub> PO <sub>4</sub>  |
| 15       | Fiber       | 5                                      | 0.93                                | PVP/Na <sub>2</sub> SO <sub>4</sub> |
| 18       | Fiber       | 1.4                                    | 40                                  | PVA/H <sub>3</sub> PO <sub>4</sub>  |
| 41       | Planar      | 1.75                                   | 3.44                                | PVA/H <sub>2</sub> SO <sub>4</sub>  |
| 42       | Planar      | 2.5                                    | 495                                 | PVA/H <sub>2</sub> SO <sub>4</sub>  |
| Our work | Fiber       | 2.1                                    | 8                                   | PVA/LiCl                            |

**Table S1.** Performance summary and comparison of different SC devices.
